# Supplementary material
Source: Springer Nature journal article supplement (https://www.springermedizin.de/resource/supplementary/12943_2014_1337_MOESM1_ESM.pdf/9552744)
Supplement: MOESM1 [file 9552744]

## **Supplemental figure legends**

**Supplemental Figure 1. MHC class-I expression in B16 tumor cells with or without IFN- $\gamma$  signaling.** MHC class-I expression on B16 cells after IFN signaling sensitization in vitro (**A**) or IFN signaling deficiency in vivo (**B**). MHC class-I expression on B16 cells after IFN signaling sensitization in vitro (**A**) or IFN signaling deficiency in vivo (**B**).

**Supplemental Figure 2. Proliferation and apoptosis of B16-OVA cells after overexpression or knockdown of USP18.** USP18 expression in B16-OVA cells was overexpressed or knocked down using lentivirus vector and confirmed by Western blot assay (**A & B**). Exponentially growing B16-OVA tumor cells stably expressing shUSP18 (B16-OVA-shUSP18) were pulsed with 10  $\mu$ M BrdU and cell proliferation was analyzed by flow cytometry (**C**). The apoptosis status of B16-OVA-shUSP18 cells was analyzed by flow cytometry staining for Annexin/PI (**D**).

**Supplemental Figure 3. Overexpression or knockdown USP18 in B16-OVA cells affects tumor growth.**  $3 \times 10^5$  B16-OVA-GFP, B16-OVA-USP18 (2) or B16-OVA-shUSP18(2) tumor cells were intravenously inoculated into C57BL/6 mice. Tumor growth was monitored 3 weeks after inoculation. B16-OVA-USP18 (2) and B16-OVA-shUSP18(2) cells lines are from different clone or shRNA.

**Supplemental Figure 4. Adhesion, invasion and migration activity of B16 cells after overexpression or knockdown of USP18 expression.** The ability of B16-OVA,

B16-OVA-USP18 and B16-OVA-shUSP18 tumor cells adhering to fibronectin-coated plates were analyzed (A). The invasion and migration ability of B16-OVA, B16-OVA-USP18 and B16-OVA-shUSP18 cells was analyzed in transwell plates coated with fibronectin (B) or matrigel (C).

**Supplemental Figure 5. Overexpression of USP18 in B16 cells does not affect cytokine secretion in vitro but does affect chemokine production in the tumor microenvironment.** Cytokine and chemokine secretion from culture supernatant of B16-OVA, B16-OVA-USP18 and B16-shUSP18 tumor cells was analyzed by cytokine array (A). Chemokine mRNA level in B16-OVA-GFP and B16-OVA-USP18 tumor microenvironment were analyzed by qRT-PCR (B).

**Supplemental Figure 6. ISG15 levels in B16-OVA-GFP, B16-OVA-USP18 or B16-OVA-shUSP18 tumor lysate.** ISG15 levels in B16-OVA-GFP, B16-OVA-USP18 or B16-OVA-shUSP18 tumor lysate was analyzed by Western blot assay.

**Supplemental Figure 7. OVA expression in B16-OVA-GFP, B16-OVA-USP18 and B16-OVA-shUSP18 tumor cells.** Western blot assay of OVA protein expression in B16-OVA tumor cells with overexpression or knockdown of USP18.

**Supplemental Figure 8. Overexpression of USP18 in B16-OVA cells affects subcutaneous tumorigenesis.** C57BL/6 mice received subcutaneous inoculation of  $1 \times 10^6$  B16-OVA-GFP and B16-OVA-USP18 cells. Effector (CD44<sup>+</sup>) T cells in tumor (A) and spleen (B) was analyzed. CD4<sup>+</sup>Foxp3<sup>+</sup> regulatory T cells located in spleen

were analyzed by flow cytometry (C).

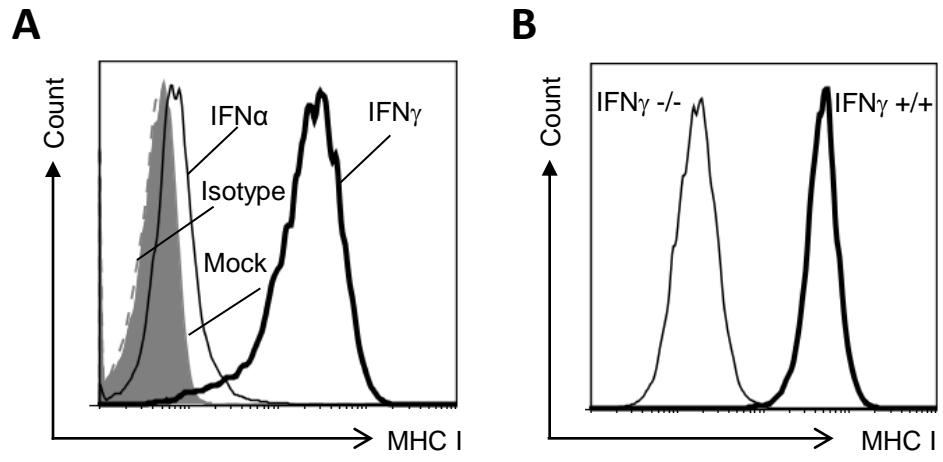

sFigure 1.

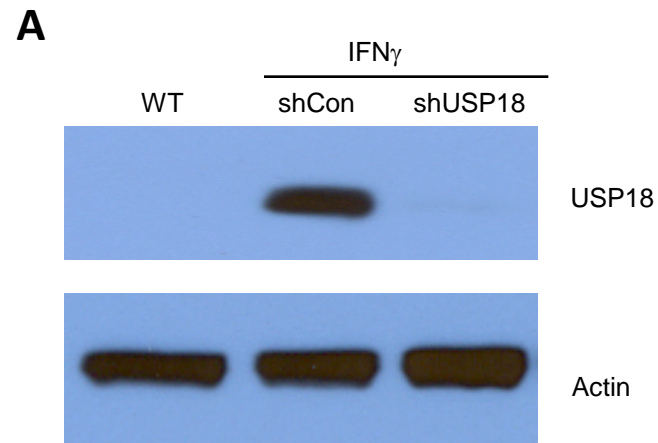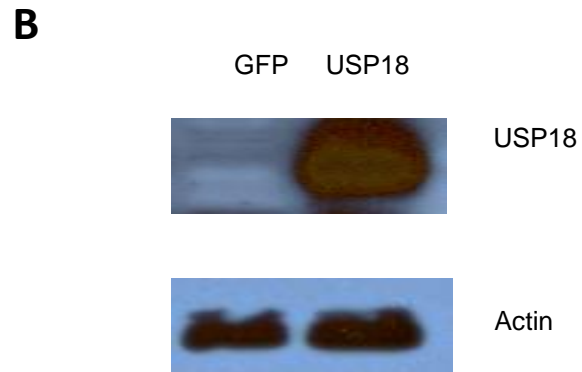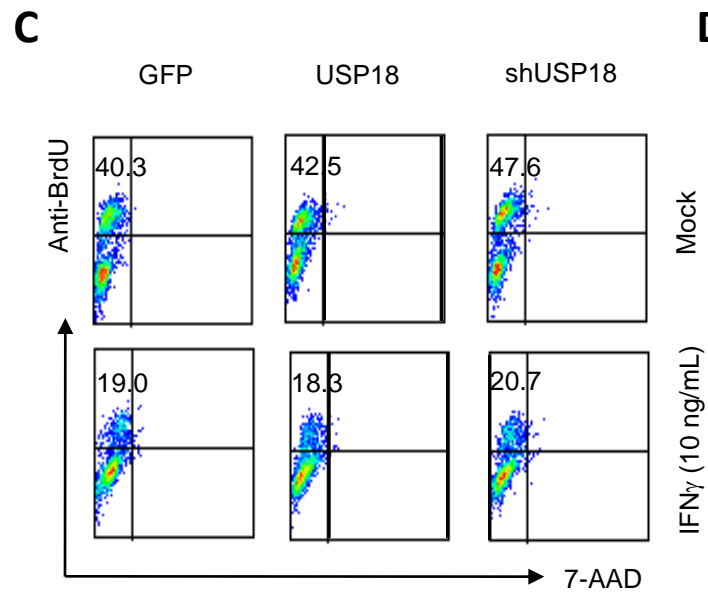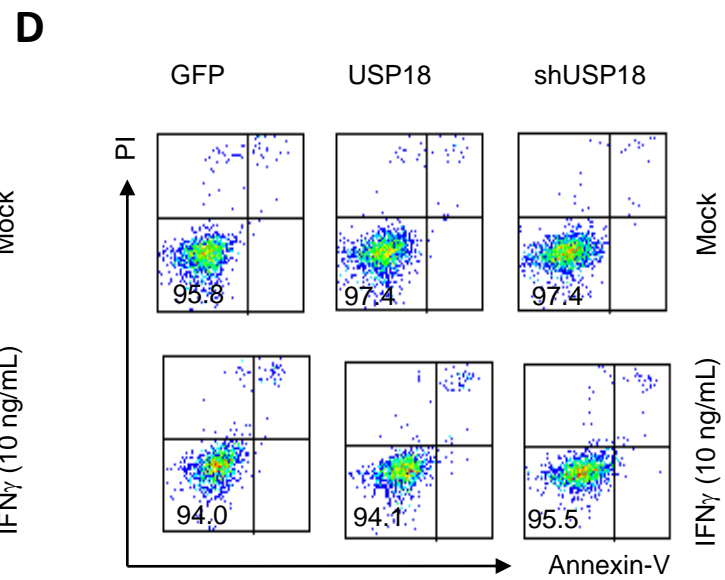

**sFigure 2.**

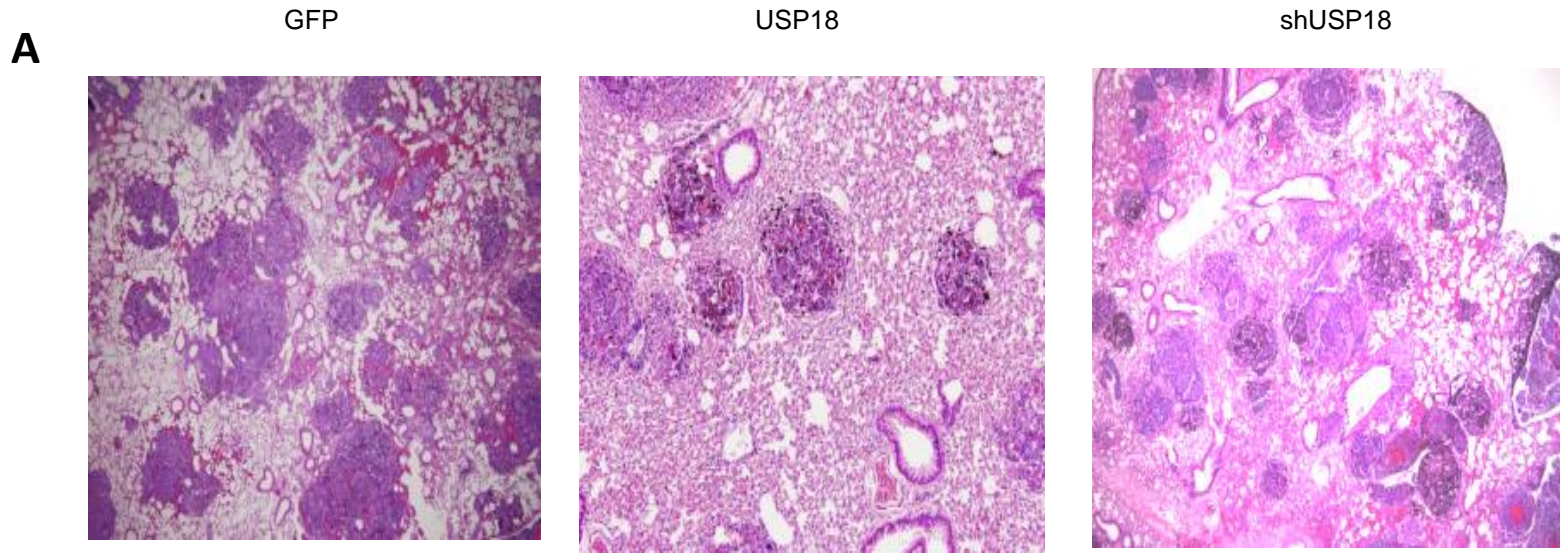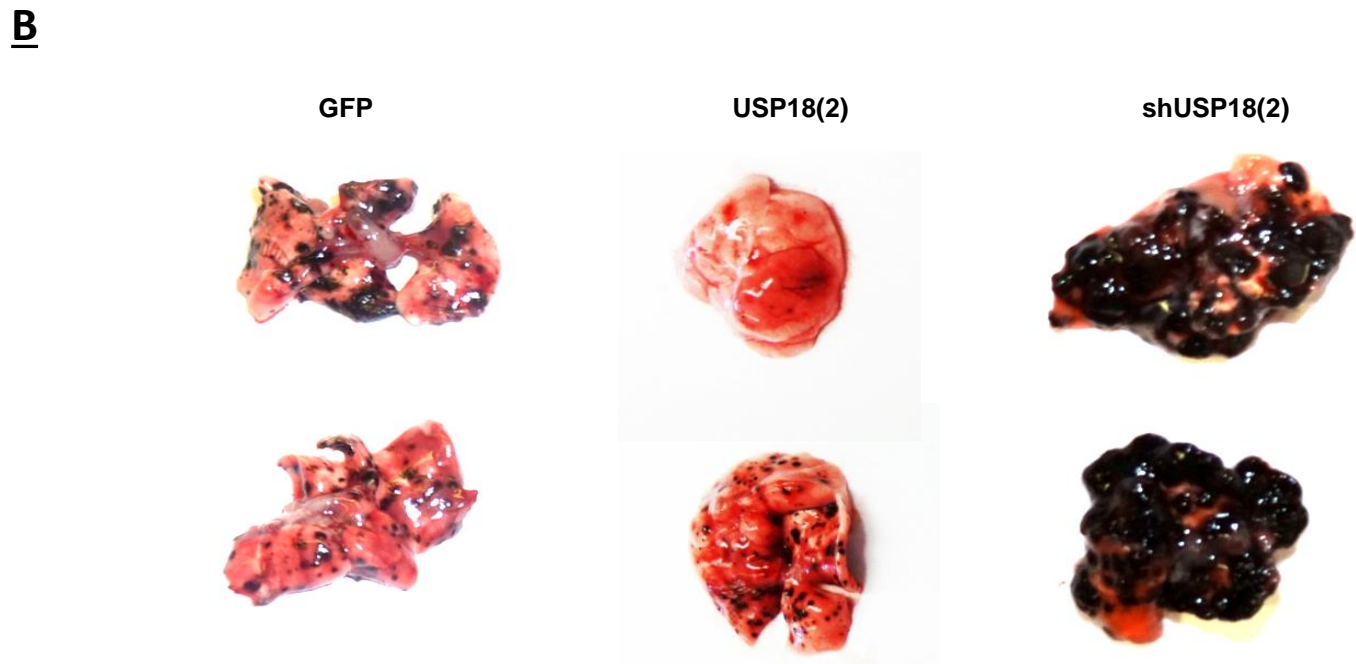

**sFigure 3.**

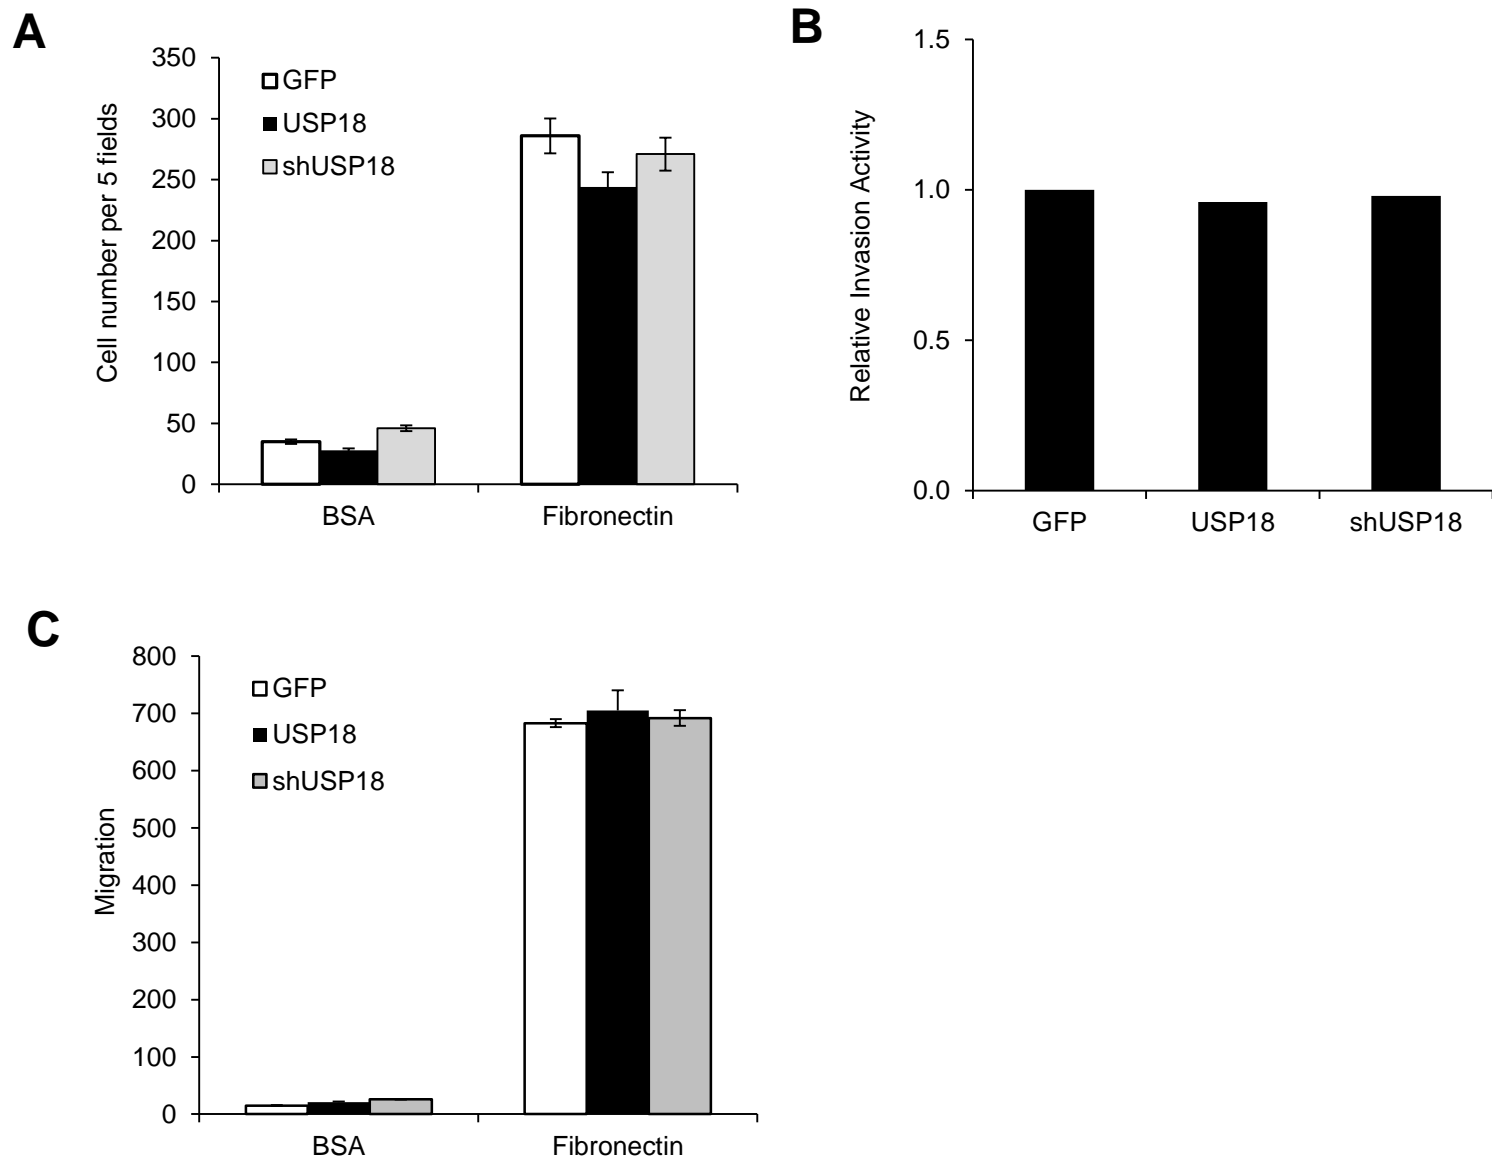

**sFigure 4.**

**A**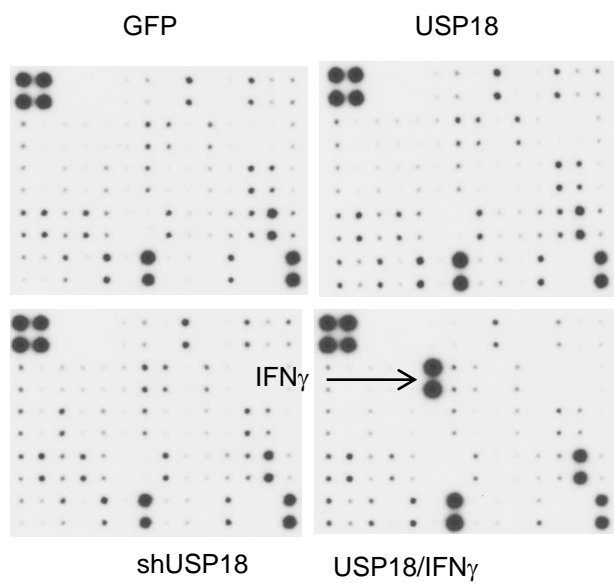**B**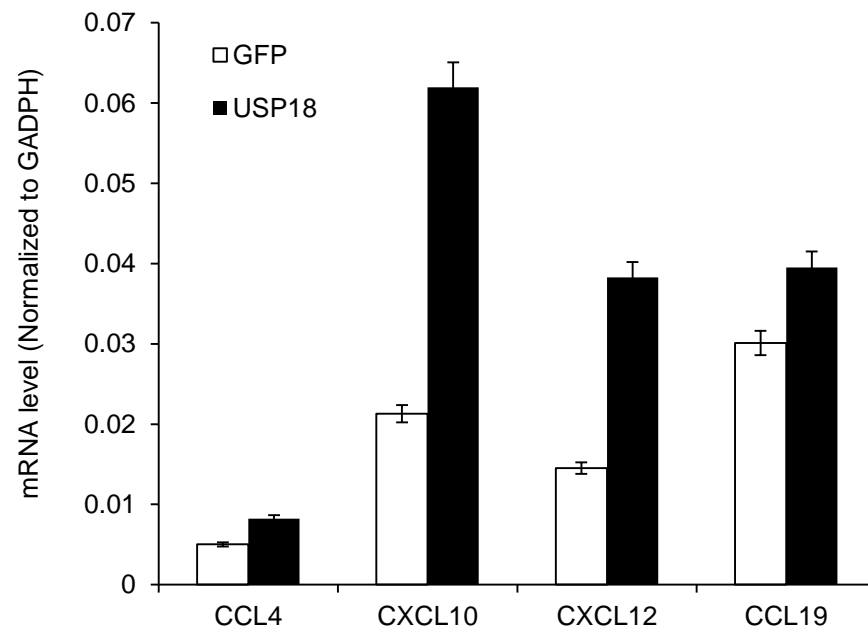**sFigure 5.**



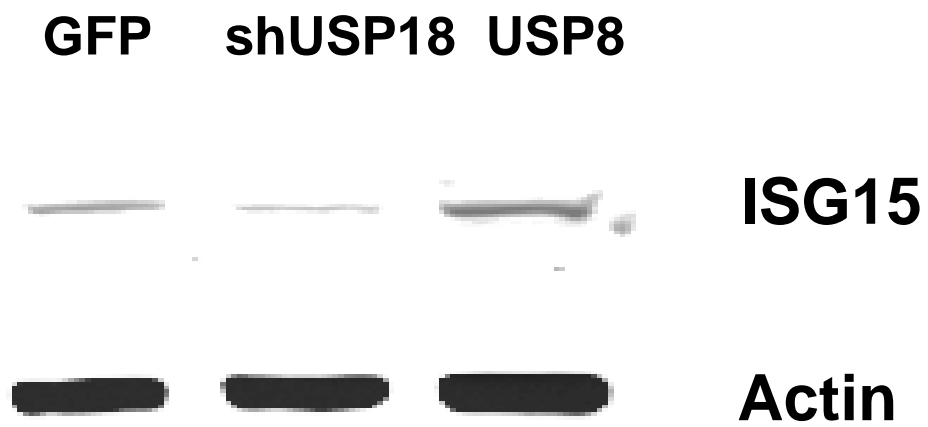

**sFigure 6.**

**GFP USP18 shUSP18**

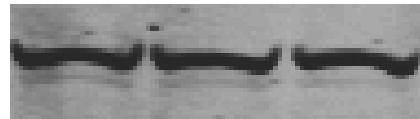

**OVA**

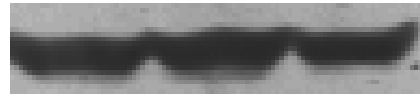

**Actin**

**A**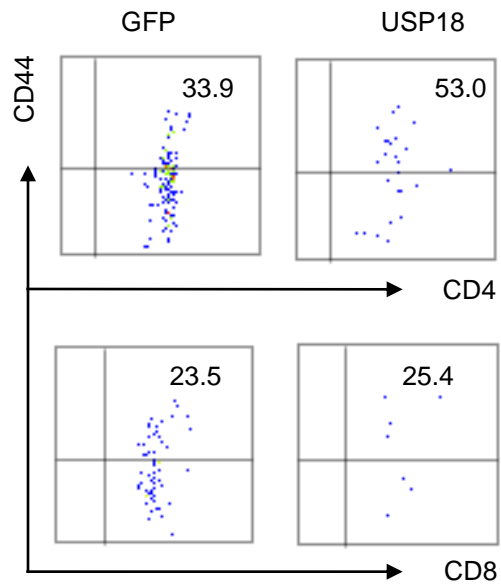**B**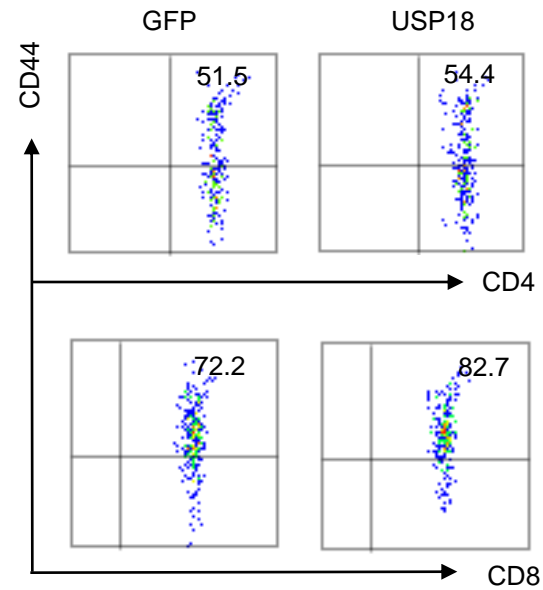**C**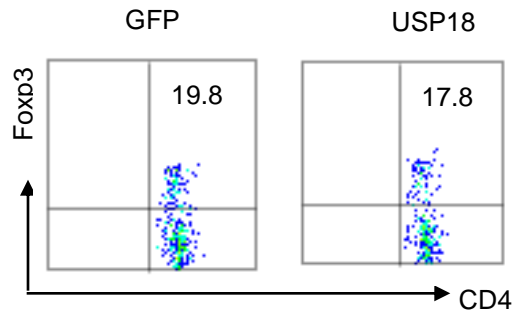**sFigure 8.**
